# Supplementary material for: Quantifying the impact of the COVID-19 pandemic on cancer screenings and diagnoses
Source: Research Square preprint supplement (doi:10.21203/rs.3.rs-842524/v1), 2021-08-26
Supplement: Supplementary file 1 [file 004e01785460f4041ecbe648.docx]

**SUPPLEMENTAL MATERIALS**

**Quantifying the impact of the COVID-19 pandemic on cancer screenings and diagnoses**

Figure 1: Cancer diagnoses over time and by cancer: A) breast cancer, B) cervical cancer, C) colorectal cancer, D) leukemia, E) lung cancer, and F) prostate cancer. The vertical lines in all plots indicate the period when North Carolina was under full SAH orders (March 30, 2020 – May 7, 2020 or weeks 66-72).

Figure 2: Advanced cancer diagnoses over time and by cancer: A) breast cancer, B) cervical cancer, C) colorectal cancer, D) leukemia, E) lung cancer, and F) prostate cancer. The vertical lines in all plots indicate the period when North Carolina was under full SAH orders (March 30, 2020 – May 7, 2020 or weeks 66-72)
